# Supplementary material for: Guanidinoacetic acid ameliorates hepatic steatosis and inflammation and promotes white adipose tissue browning in middle-aged mice with high-fat-diet-induced obesity
Source: Royal Society of Chemistry journal article supplement (doi:10.1039/d3fo05201j), 2024-01-01
Supplement: d3fo05201j1.pdf [file d3fo05201j1.pdf]

## Supplementary materials

**Table S1.** Primer sequences used for qRT-PCR.

| <b>Genes</b>  | <b>Forward (5'–3')</b>     | <b>Reverse (5'–3')</b>  |
|---------------|----------------------------|-------------------------|
| <i>18S</i>    | TTGTTGGTTTTTCGGAAGCTGAGGC  | GGCAAATGCTTTCGCTCTGGTC  |
| <i>Ndufv1</i> | TGTTTGGATGCCCCACAAC        | CTGTGACACCACCAGCATGT    |
| <i>IL-4</i>   | AGTGAGCTCGTCTGTAGGGC       | CAGGCATCGAAAAGCCCGAA    |
| <i>TNF-α</i>  | GCCAACGGCATGGATCTCAA       | TAGCAAATCGGCTGACGGTG    |
| <i>IL-1β</i>  | TCGCAGCAGCACATCAACAA       | TCCACGGGAAAGACACAGGT    |
| <i>IL-6</i>   | CCACTTCACAAGTCGGAGGC       | TCTGCAAGTGCATCATCGTTGT  |
| <i>PPARγ</i>  | AGGCCGAGAAGGAGAAGCTGTTG    | TGGCCACCTCTTTGCTCTGCTC  |
| <i>FASN</i>   | GGAGGTGGTGATAGCCGGTAT      | TGGGTAATCCATAGAGCCCAG   |
| <i>ACC</i>    | AGCAAGGTCGAGACCGAAAG       | TAAGACCACCGGCGGATAGA    |
| <i>HSL</i>    | TCGGGGAGCACTACAAACG        | CACGCAACTCTGGGTCTATGG   |
| <i>ATGL</i>   | GGTGCCAACATTATTGAGGTG      | AAACACGAGTCAGGGAGATGC   |
| <i>FABP1</i>  | GTGGTCCGCAATGAGTTCAC       | TGTCGCCCAATGTCATGGT     |
| <i>APOB</i>   | CAAGTCCACGTCATCCCCAA       | GGGGCTGGACACTTCAATCA    |
| <i>UCP1</i>   | GTGAACCCGACAACCTCCGAA      | TGCCAGGCAAGCTGAAACTC    |
| <i>PGC-1α</i> | GAAATCCGAGCGGAGCTGAA       | GAATAGGGCTGCGTGCCATC    |
| <i>Cidea</i>  | ATCACAACCTGGCCTGGTTACG     | TACTACCCGGTGTCCATTTCT   |
| <i>Ndufs3</i> | CGTGTGTTCTCCGGCTACTT       | TCAAGGCAGGACACCTGAAC    |
| <i>Sdhb</i>   | AGAGTCGGCCTGCAGTTTC        | CAACACCATAGGTCCGCACT    |
| <i>Sdhd</i>   | CAAGCCACCACTCTGGTTCC       | GGGTGTCCCCATGAACGTAG    |
| <i>Uqcrc1</i> | GGCTAACCCAGACAACGTGA       | GGTACATAGGCGCATCCACT    |
| <i>Uqcrc2</i> | CCGGGTCCTTCTCGAGATTTT      | TGCTTCAATCCCACGGGTTA    |
| <i>Cox2</i>   | CCCACCTTTGCCATTATATTTGTAGG | TTTCATGTGGTGTAAGCATCTGG |
| <i>Cox7a</i>  | CAGCGTCATGGTCAGTCTGT       | AGAAAACCGTGTGGCAGAGA    |
| <i>Atp5a1</i> | CCTTGACCTTCCTTTGCGCT       | CATTTTTGGAGACCAGTCCCG   |
| <i>Gamt</i>   | GCAGCCACATAAGGTTGTTC       | CTCTTCAGACAGCGGGTACG    |

|               |                        |                       |
|---------------|------------------------|-----------------------|
| <i>Ckb</i>    | GCCTCACTCAGATCGAAACTC  | GGCATGTGAGGATGTAGCCC  |
| <i>Alpl</i>   | TCAACACCAATGTAGCCAAGA  | GTAGCTGGCCCTTAAGGATTC |
| <i>Slc6a8</i> | TGCATATCTCCAAGGTGG CAG | CTACAAACTGGCTGTCCAGA  |

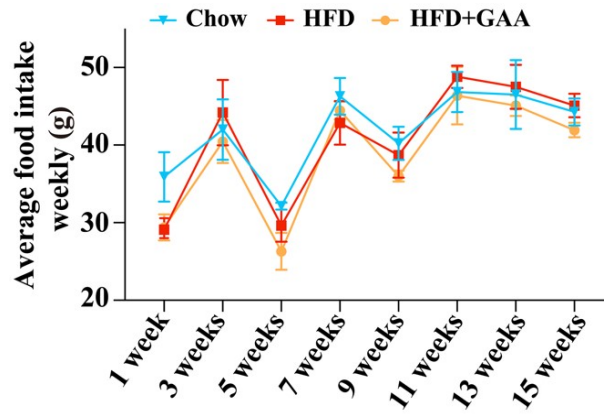

**Fig. S1** The average food intake weekly from the chow, HFD, and HFD+GAA groups ( $n = 8$ ).

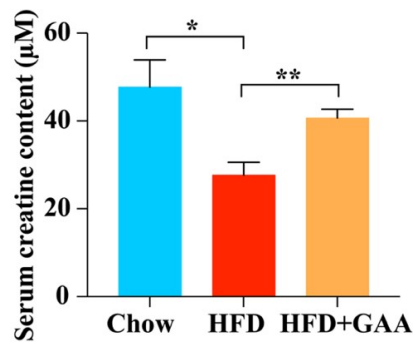

**Fig. S2** The serum creatine content from the chow, HFD, and HFD+GAA groups ( $n = 6$ ). \* $P < 0.05$ , \*\* $P < 0.01$ .

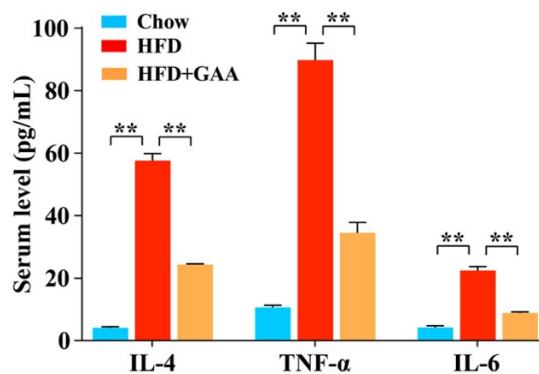

**Fig. S3** The serum levels of IL-4, TNF- $\alpha$ , and IL-6 in mice were determined by ELISA ( $n = 6$ ). \*\* $P < 0.01$ .

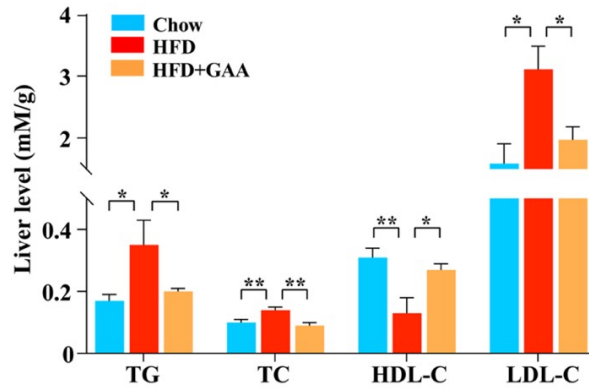

**Fig. S4** The levels of TG, TC, HDL-C and LDL-C in the liver of mice were determined by ELISA ( $n = 6$ ). \* $P < 0.05$ , \*\* $P < 0.01$ .

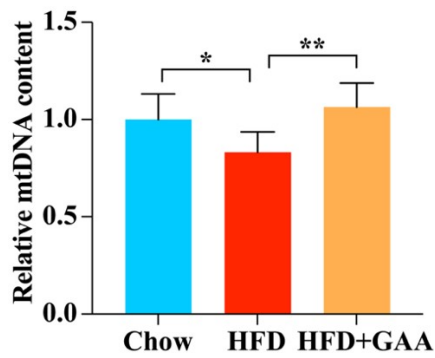

**Fig. S5** The relative mtDNA content (mtDNA/nDNA ratio) in the iWAT of mice ( $n = 6$ ). \* $P < 0.05$ , \*\* $P < 0.01$ .
